# Supplementary material for: Biodegradable chito-beads replacing non-biodegradable microplastics for cosmetics
Source: Royal Society of Chemistry journal article supplement (doi:10.1039/d1gc01588e), 2021-01-01
Supplement: d1gc01588e4.pdf [file d1gc01588e4.pdf]

Electronic Supplementary Information for

**Biodegradable chito-beads replacing non-biodegradable microplastics for cosmetics**

Sunghbin Ju<sup>a,b</sup>, Giyoung Shin<sup>a</sup>, Minkyung Lee<sup>a</sup>, Jun Mo Koo<sup>a</sup>, Hyeonyeol Jeon<sup>a</sup>, Yong Sik Ok<sup>c</sup>, Dong Soo Hwang<sup>\*b</sup>,  
Sung Yeon Hwang<sup>\*a,d</sup>, Dongyeop X. Oh<sup>\*a,d</sup>, Jeyoung Park<sup>\*a,b,d</sup>

<sup>a</sup> Research Center for Bio-based Chemistry, Korea Research Institute of Chemical Technology (KRICT), Ulsan 44429, Republic of Korea. Email: crew75@kRICT.re.kr, dongyeop@kRICT.re.kr, jypark@kRICT.re.kr.

<sup>b</sup> Division of Environmental Science and Engineering, Pohang University of Science and Technology (POSTECH), Pohang 37673, Republic of Korea. Email: dshwang@postech.ac.kr

<sup>c</sup> Korea Biochar Research Center, APRU Sustainable Waste Management Program & Division of Environmental Science and Ecological Engineering, Korea University, Seoul 02841, Republic of Korea

<sup>d</sup> Advanced Materials and Chemical Engineering, University of Science and Technology (UST), Daejeon 34113, Republic of Korea.

## Supplementary Tables

**Table S1.** Comparison of the hardness of indentation in this study with previous reports on natural nutshell, synthetic polymers and extracted skin exfoliators.

| Synthetic polymer |                               |      | Natural polymer |                               |           |
|-------------------|-------------------------------|------|-----------------|-------------------------------|-----------|
| Material          | Hardness of indentation (MPa) | Ref. | Material        | Hardness of indentation (MPa) | Ref.      |
| UHMWPE            | 73.1                          | 1    | Walnut shell    | 290                           | 2         |
| PVC               | 86.9                          | 1    | Walnut          | 450                           | 2         |
| PVA               | 39.2                          | 1    | Pistachio       | 360                           | 2         |
| PS                | 167.5                         | 1    | Pecan           | 560                           | 2         |
| PMMA              | 164.5                         | 3    | Paranut         | 330                           | 2         |
| PMMA              | 187.1                         | 1    | Macadamia       | 540                           | 2         |
| PE                | 122                           | 4    | Hazelnut        | 330                           | 2         |
| PC                | 127.2                         | 1    | Beechnut        | 130                           | 2         |
| PAA               | 244.8                         | 1    | Apricot shell   | 244                           | 4         |
| Nylon 6           | 157.9                         | 1    | CB-H-1          | 128.1                         | This work |
| LDPE              | 24                            | 5    | CB-M-1          | 113.3                         | This work |
| LDPE              | 19.9                          | 6    | CB-L-1          | 129.7                         | This work |
| LDPE              | 22.4                          | 1    | Chitosan        | 82.9                          | This work |
| HDPE              | 37.9                          | 6    |                 |                               |           |
| HDPE              | 61.8                          | 1    |                 |                               |           |

UHMWPE: Ultra-high molecular weight polyethylene; PVC: Polyvinyl chloride; PVA: Polyvinyl alcohol; PS: Polystyrene; PMMA: Polymethyl methacrylate; PE: Polyethylene; PC: Polycarbonate; PAA: Polyacrylic acid; LDPE: Low-density polyethylene; HDPE: High-density polyethylene.

**Table S2.** Components of liquid soap used for cleansing tests.

| <b>Chemical name</b>           | <b>Function</b>  | <b>Wt%</b> |
|--------------------------------|------------------|------------|
| Sodium laureth sulfate         | Surfactant       | 10         |
| Cocamide diethanolamine        | Thickener        | 4          |
| Disodium lauryl sulfosuccinate | Surfactant       | 6          |
| Lauryl glucosides              | Surfactant       | 3          |
| Glycerin                       | Humectant        | 2          |
| Citric acid                    | pH controller    | 0.1        |
| Sodium Chloride                | Thickener        | 0.1        |
| Purified water                 |                  | 74.6       |
| Sodium Hyaluronate             | Skin conditioner | 0.1        |
| Centella asiatica              | Skin conditioner | 0.1        |

**Table S3.** Effects of different Chito-beads concentrations on germination rate, shoot length, root length, dry weight, and seedling vigor index of *Avena sativa* L.

|                                         | <b>Control (0 mg/kg)</b> | <b>100 mg/kg</b>      | <b>1000 mg/kg</b>     |
|-----------------------------------------|--------------------------|-----------------------|-----------------------|
| <b>Shoot length (cm)</b>                | 28.7 ( $\pm 4.4$ )       | 26.3 ( $\pm 9.4$ )    | 28.7 ( $\pm 4.8$ )    |
| <b>Root length (cm)</b>                 | 18.0 ( $\pm 8.0$ )       | 18.4 ( $\pm 7.1$ )    | 18.2 ( $\pm 5.3$ )    |
| <b>Germination rate (%)<sup>a</sup></b> | 100 ( $\pm 0$ )          | 100 ( $\pm 0$ )       | 90 ( $\pm 4.71$ )     |
| <b>Dry weight (g)<sup>b</sup></b>       | 0.13 ( $\pm 0.013$ )     | 0.145 ( $\pm 0.002$ ) | 0.153 ( $\pm 0.019$ ) |
| <b>SVI - I</b>                          | 4678 ( $\pm 162$ )       | 4471 ( $\pm 312$ )    | 4442 ( $\pm 337$ )    |
| <b>SVI - II</b>                         | 13.0 ( $\pm 1.3$ )       | 14.5 ( $\pm 0.2$ )    | 13.8 ( $\pm 1.8$ )    |

<sup>a</sup>Percentage of plants grown after 14 days divided by the total seed planted. <sup>b</sup>Total dry mass divided by the number of samples. Data are the mean  $\pm$  standard error.

**Table S4.** Effects of different Chito-beads concentrations on germination rate, shoot length, root length, dry weight, and seedling vigor index of *Brassica napus L.*

|                                         | <b>Control (0 mg/kg)</b> | <b>100 mg/kg</b>     | <b>1000 mg/kg</b>     |
|-----------------------------------------|--------------------------|----------------------|-----------------------|
| <b>Shoot length (cm)</b>                | 11.9 ( $\pm 1.7$ )       | 10.5 ( $\pm 1.6$ )   | 11.0 ( $\pm 1.6$ )    |
| <b>Root length (cm)</b>                 | 12.8 ( $\pm 8.1$ )       | 16.3 ( $\pm 5.1$ )   | 16.3 ( $\pm 3.5$ )    |
| <b>Germination rate (%)<sup>a</sup></b> | 80 ( $\pm 0$ )           | 70 ( $\pm 5.34$ )    | 90 ( $\pm 4.71$ )     |
| <b>Dry weight (g)<sup>b</sup></b>       | 0.162 ( $\pm 0.025$ )    | 0.22 ( $\pm 0.003$ ) | 0.175 ( $\pm 0.014$ ) |
| <b>SVI - I</b>                          | 2085 ( $\pm 214$ )       | 1876 ( $\pm 210$ )   | 2447 ( $\pm 161$ )    |
| <b>SVI - II</b>                         | 13.0 ( $\pm 2.0$ )       | 15.4 ( $\pm 1.2$ )   | 15.8 ( $\pm 1.5$ )    |

<sup>a</sup>Percentage of plants grown after 14 days divided by the total seed planted. <sup>b</sup>Total dry mass divided by the number of samples. Data are the mean  $\pm$  standard error.

**Table S5.** Characterization of base soil used for phytotoxicity test according to fertilizer quality inspection of rural development administration, Korea.

| Parameters                        | Base soil    |
|-----------------------------------|--------------|
| Nitrogen (mg/kg)                  | 1226.1       |
| pH                                | 6.75         |
| Soil water (%)                    | 21.47        |
| Bulk density (g/cm <sup>3</sup> ) | 0.58         |
| Electrical conductivity (dS/m)    | 0.42         |
| <i>Listeria monocytogenes</i>     | Not detected |
| Arsenic (mg/kg)                   | 2.09         |
| Cadmium (mg/kg)                   | 0.26         |
| Mercury (mg/kg)                   | 0.0075       |
| Lead (mg/kg)                      | 11.25        |
| Copper (mg/kg)                    | 28.96        |
| Nickel (mg/kg)                    | 35.72        |
| Zinc (mg/kg)                      | 60.94        |

## Supplementary Figures

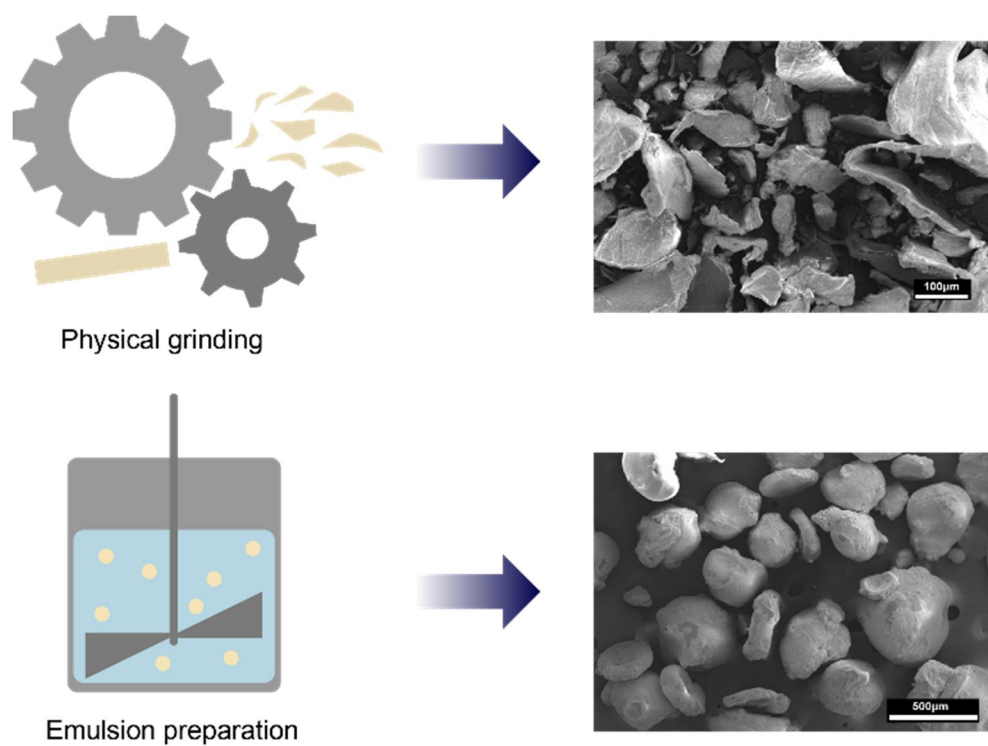

**Fig. S1.** Differences in particle morphology according to the preparation methods.

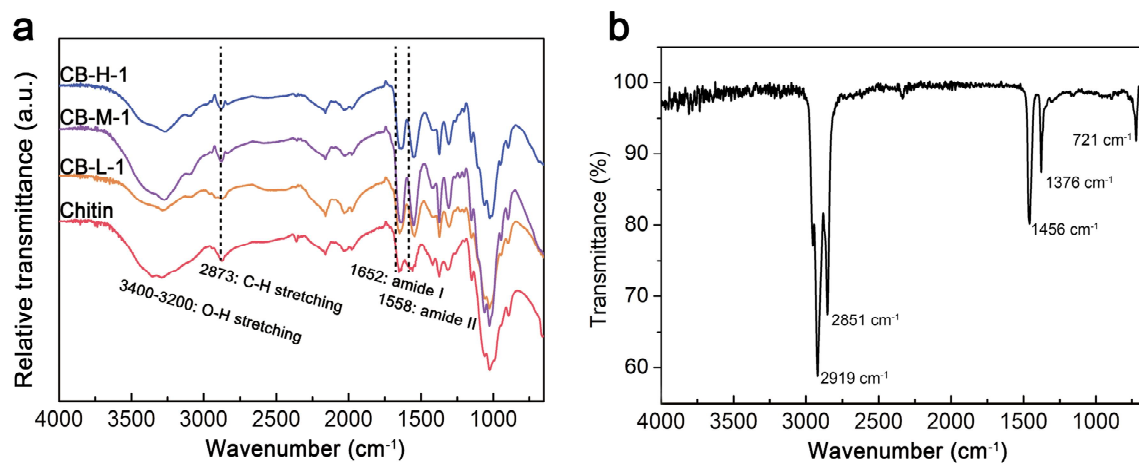

**Fig. S2.** (a) FTIR spectra of chito-beads compared with commercial chitin powder. (b) FTIR spectra of paraffin oil used in the continuous phase. 2851  $\text{cm}^{-1}$  and 2919  $\text{cm}^{-1}$  (C–H stretching), 1456  $\text{cm}^{-1}$  (C–H bending), and 721  $\text{cm}^{-1}$  ( $\text{CH}_2$  rocking)<sup>7</sup>.



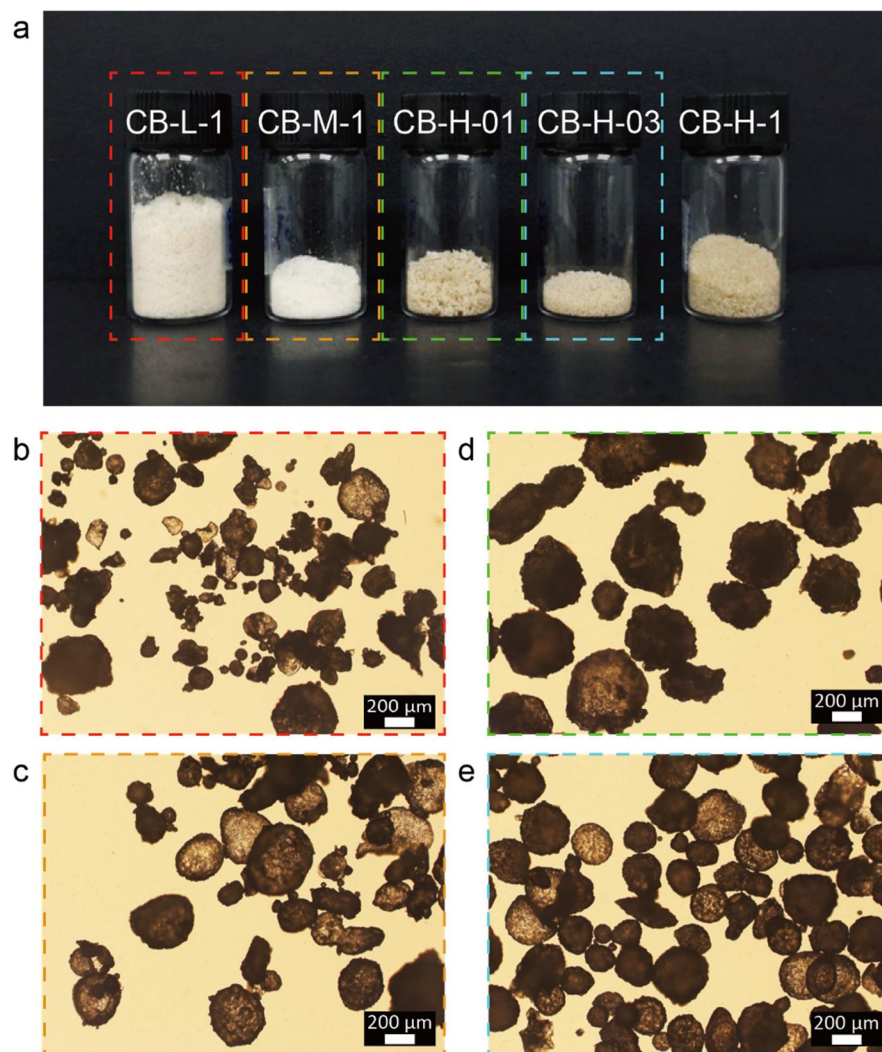

**Fig. S3.** (a) Photograph of acetylated chitosan microbeads differing molecular weight and degree of acetylation. Optical microscope images of: (b) CB-L-1, (c) CB-M-1, (d) CB-H-01, and (e) CB-H-03.

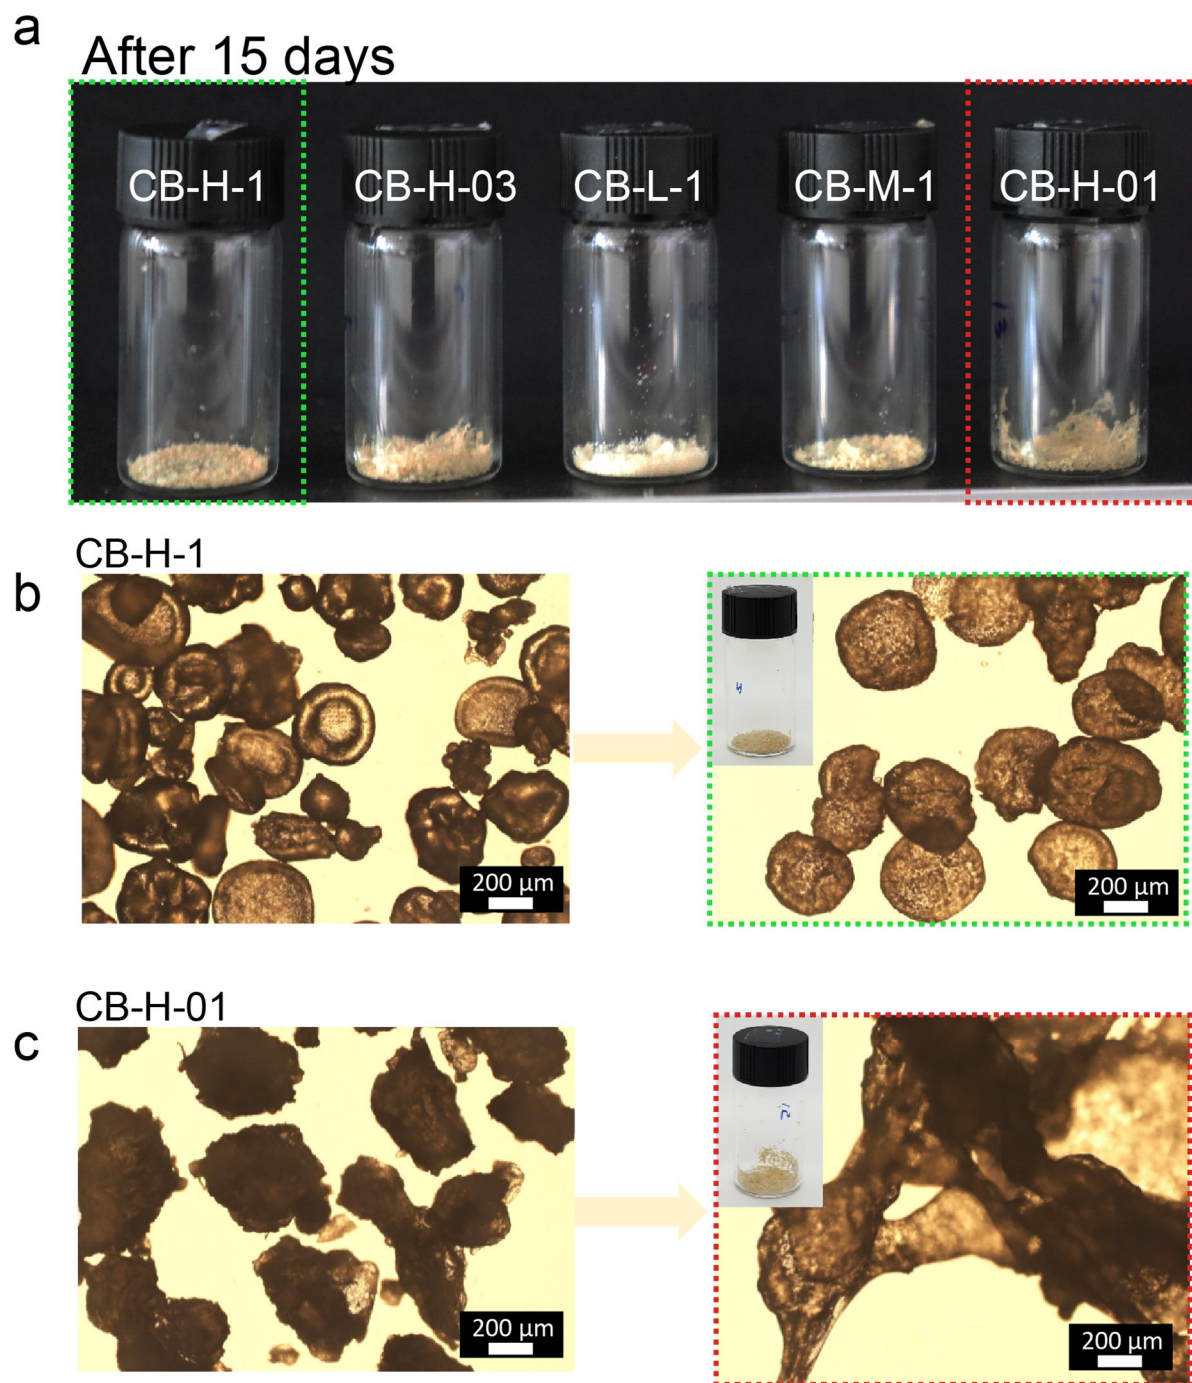

**Fig. S4.** (a) Photograph of acetylated chitosan particles soaking in deionized (DI) water for 2 weeks; (b) optical microscope image of CB-H-1 particles maintaining its shape after 2 weeks in DI water; and (c) optical microscope image of CB-H-01 particles deformed its shape after 2 weeks in DI water.

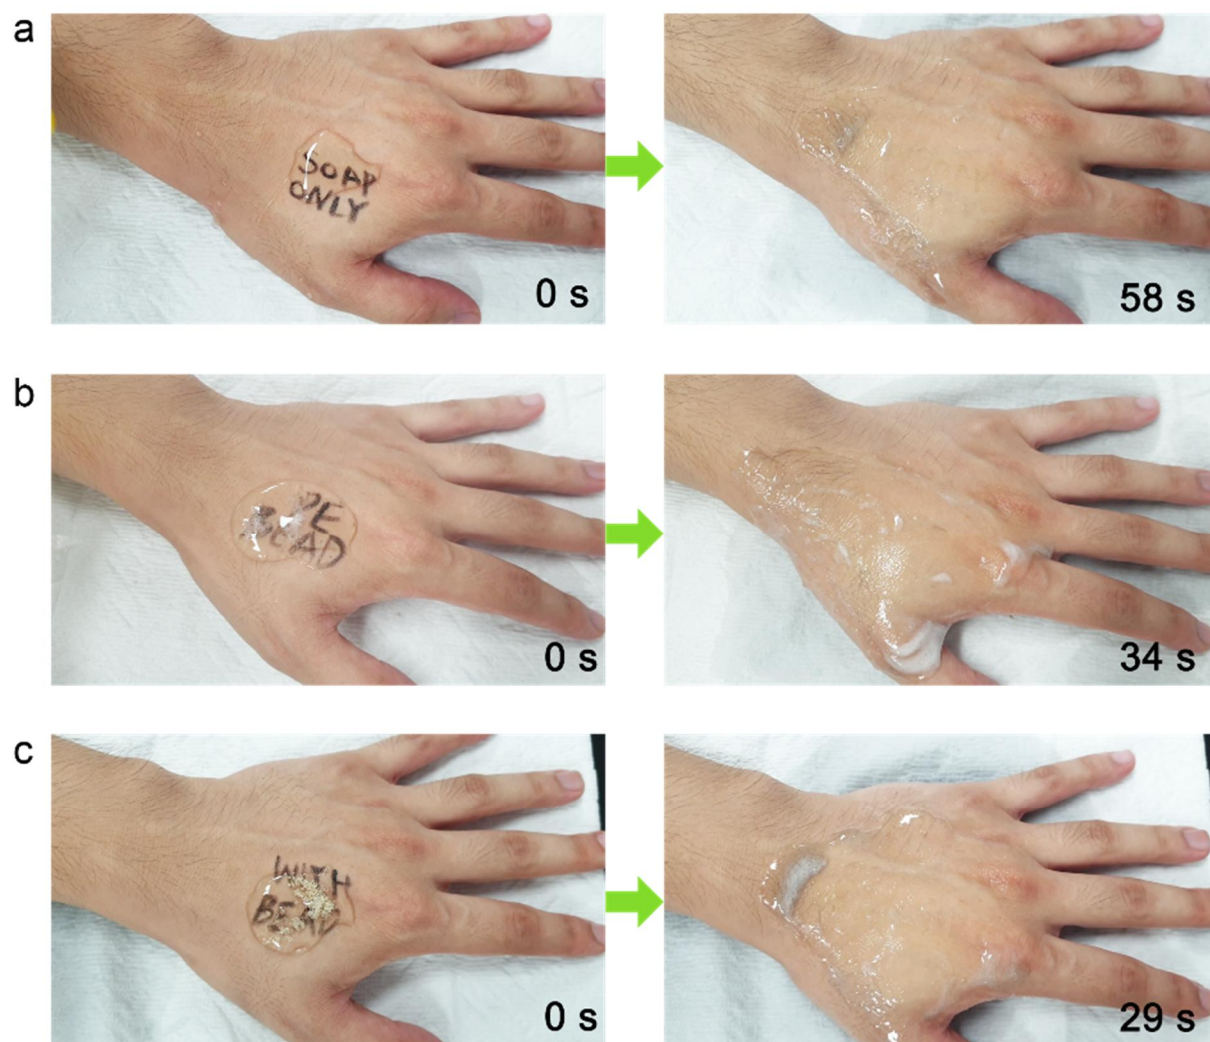

**Fig. S5.** Comparison of cleansing efficiency using: (a) Liquid soap; (b) soap with polyethylene (PE) beads; and (c) soap with CB-H-1 on the skin.



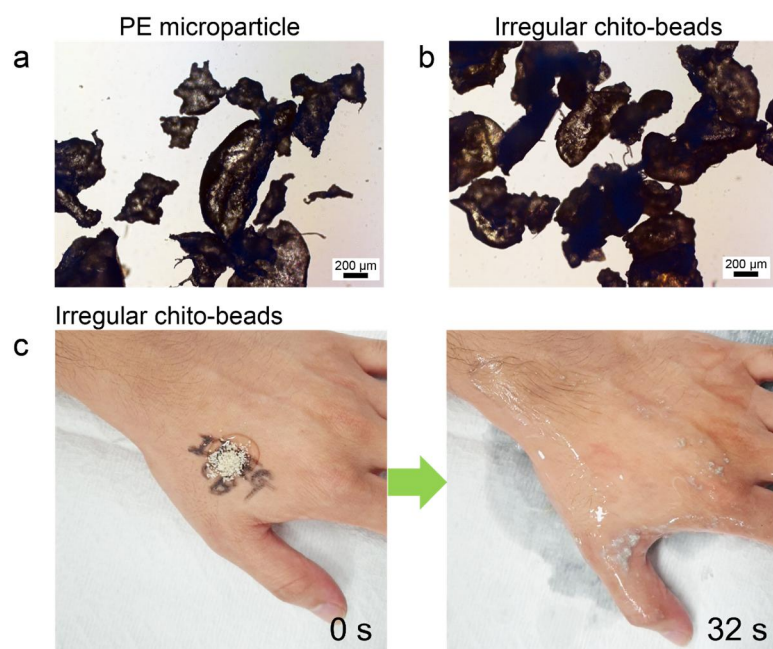

**Fig. S6.** Optical microscope image of (a) PE microparticle, (b) irregular chito-beads; (c) Cleansing efficiency using soap with irregular CB-H-1 on skin.

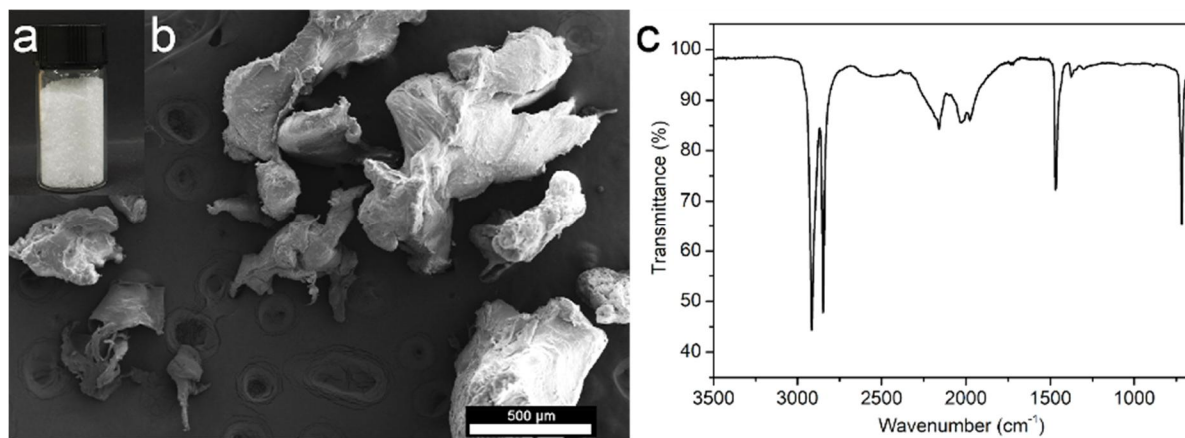

**Fig. S7.** (a) Photograph and (b) SEM image of polyethylene (PE) microbeads extracted from commercial body scrub; and (c) FTIR spectra.

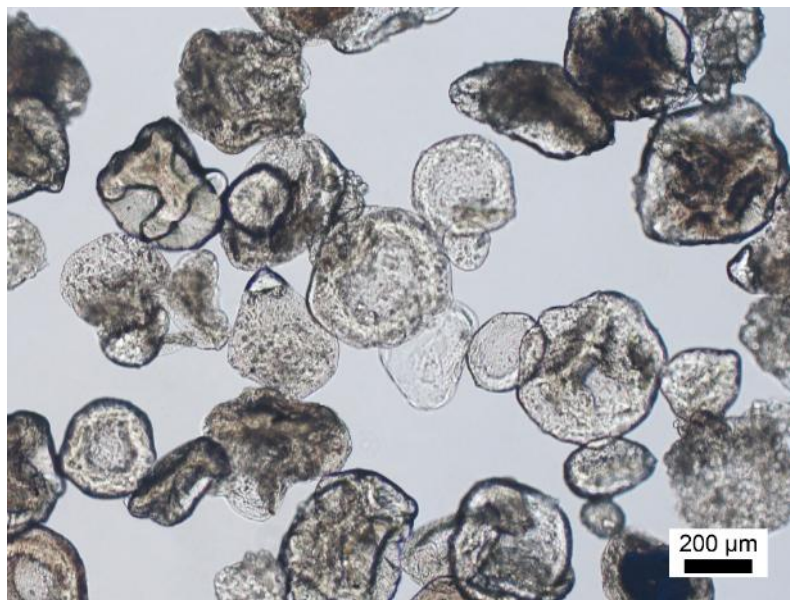

**Fig. S8.** Optical microscope image of CB-H-1 stored in paraffin oil for 15 days.

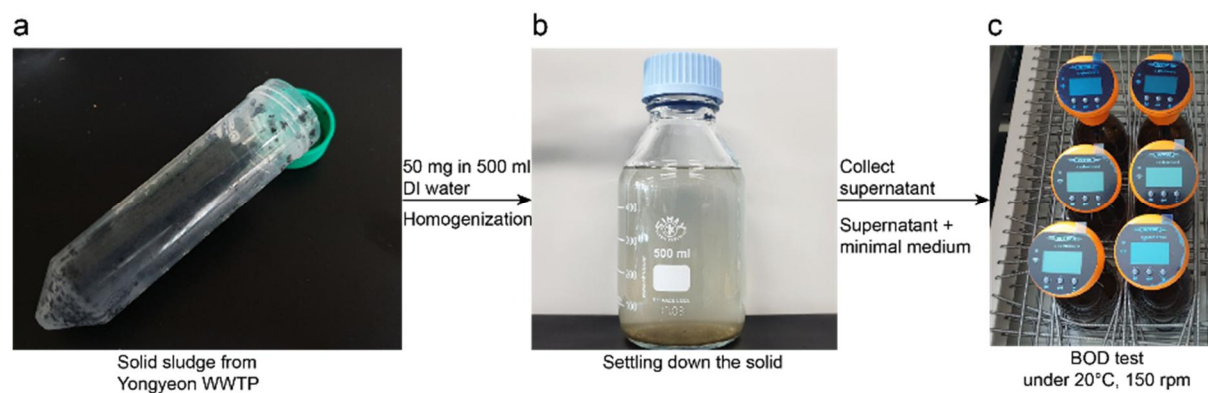

**Fig. S9.** Photographs of: (a) Obtained solid sludge; (b) homogenized and settling down; and (c) incubating for 15 days at 20 °C and 150 rpm in the dark condition.

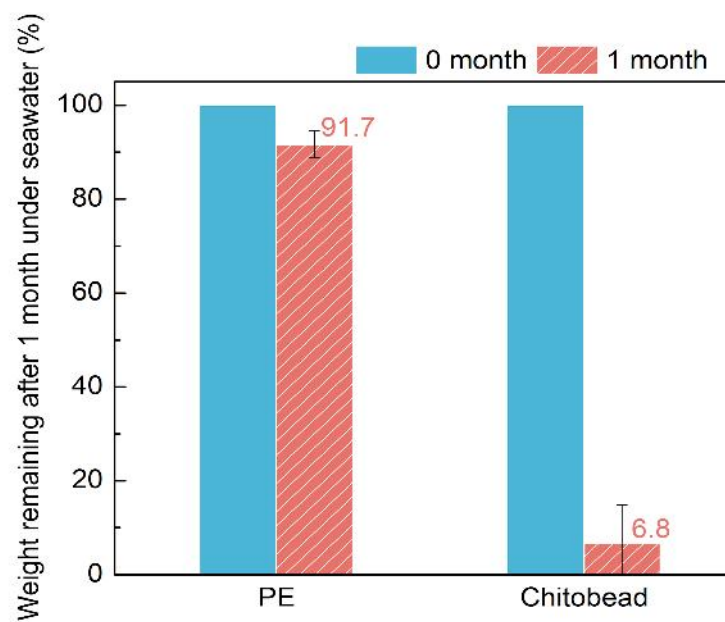

**Fig. S10.** Weight (%) of polyethylene (PE) microparticles and Chito-beads remaining after 1 month in seawater. Error bars represent the standard deviation.



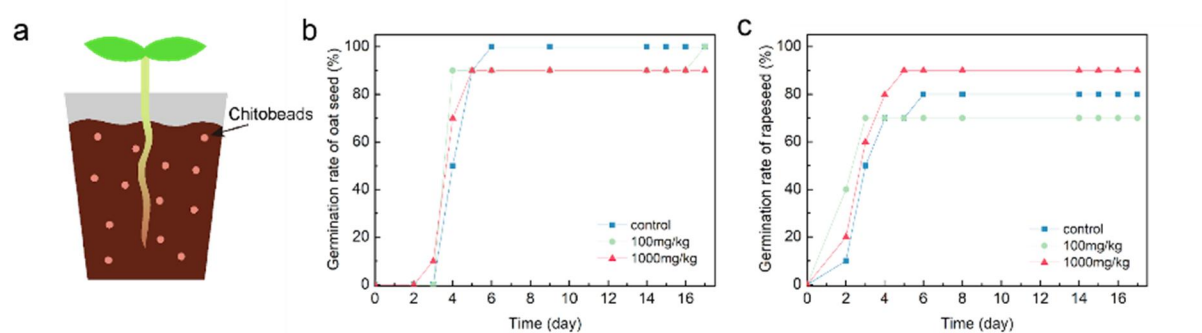

**Fig. S11.** Phytotoxicity test of Chito-beads in soils. (a) Illustration of plants growing in soils mixed with Chito-beads. Germination rates of: (b) oat (*Avena sativa* L.) and (c) rapeseed (*Brassica napus* L.) for 17 days.

## Supplementary References

- 1 A.-Y. Jee and M. Lee, *Polym. Test.*, 2010, **29**, 95-99.
- 2 G. Kaupp and M. R. Naimi-Jamal, *J. Mater. Chem.*, 2011, **21**, 8389-8400.
- 3 Y. Yang, C.-E. He, W. Tang, C. P. Tsui, D. Shi, Z. Sun, T. Jiang and X. Xie, *J. Mater. Chem. A*, 2014, **2**, 20038-20047.
- 4 W. Li, Z. H. Zhai, Q. Pang, L. Kong and Z. R. Zhou, *Wear*, 2013, **301**, 353-361.
- 5 P. Nikaeen, D. Depan and A. Khattab, *Nanomaterials*, 2019, **9**, 1357.
- 6 D. Manas, M. Ovsik, A. Mizera, M. Manas, L. Hylova, M. Bednarik and M. Stanek, *Polymers*, 2018, **10**, 158.
- 7 Amit, R. Jamwal, S. Kumari, A. S. Dhaulaniya, B. Balan and D. K. Singh, *LWT*, 2020, **118**, 108754.
